# Supplementary material
Source: HighWire-hosted journal article supplement (https://www.cmajopen.ca/highwire/filestream/89874/field_highwire_adjunct_files/7/open-2022-0084-original-submission.pdf)
Supplement: open-2022-0084-original-submission.pdf [file open-2022-0084-original-submission.pdf]

1  
2  
3 1 **Using Care Pathways for Cancer Diagnosis in Primary Care: A Qualitative Study to Understand Family**  
4  
5 2  
6 **Physicians' Mental Models**  
7  
8 3  
9

10 4 **Authorship**

11 5 Anna Pujadas Botey, PhD, MSc <sup>1,2\*</sup>

12 6 Tanya Barber, MA <sup>3</sup>

13 7 Paula J. Robson, PhD, RNutr(UK) <sup>2,4</sup>

14 8 Barbara M. O'Neill, MBA, RN <sup>4</sup>

15 9 Lee A. Green, MD, MPH <sup>3</sup>

16 10  
17 11 <sup>1</sup> Cancer Strategic Clinical Network, Alberta Health Services. Calgary, Alberta, Canada

18 12 <sup>2</sup> School of Public Health, University of Alberta. Edmonton, Alberta, Canada

19 13 <sup>3</sup> Department of Family Medicine, University of Alberta. Edmonton, Alberta, Canada

20 14 <sup>4</sup> Cancer Strategic Clinical Network, Alberta Health Services. Edmonton, Alberta, Canada

21 15

22 16 \* Corresponding author:

23 17 E-mail: [Anna.PujadasBotey@ahs.ca](mailto:Anna.PujadasBotey@ahs.ca) (APB)

24 18

25 19 **Funding statement:**

26 20 The authors received no specific funding for this work.

27 21

28 22 **Competing interests:**

29 23 The authors have declared that no competing interests exist.

30 24

1  
2  
3 25 **Abstract**  
4

5 26 BACKGROUND: Care pathways are tools that can help family physicians navigate the complexities of the  
6  
7 27 cancer diagnostic process. The objective was to examine the mental models associated with using care  
8  
9 28 pathways for cancer diagnosis of a group of family physicians in Alberta.

10 29 METHODS: We conducted a qualitative study using Cognitive Task Analysis, with interviews in the  
11  
12 30 primary care setting between February and March 2021. Family physicians whose practices were not  
13  
14 31 heavily oriented toward cancer patients and who did not work closely with specialized cancer clinics  
15  
16 32 were recruited with the support of the Alberta Medical Association and our familiarity with Alberta's  
17  
18 33 Primary Care Networks. Simulation exercise interviews with three pathway examples were conducted  
19  
20 34 over Zoom, and data were analyzed using both a framework-guide based on macrocognitive theory and  
21  
22 35 thematic analysis.  
23  
24  
25  
26  
27

28 36 RESULTS: Eight family physicians participated in interviews. Main subthemes for macrocognitive  
29  
30 37 functions and mental models were: sensemaking and learning (including confirmation and validation,  
31  
32 38 guidance and support, and sensegiving to patients), care coordination and diagnostic decision-making  
33  
34 39 (shared understanding). Main subthemes related to the use of the pathways were: limited use in  
35  
36 40 diagnosis decisions, use in guiding and supporting referral, just relevant and easy-to-process  
37  
38 41 information, and easily accessible.

39 42 INTERPRETATION: Findings suggested the importance of developing pathways that can be easily  
40  
41 43 integrated into family physicians' practices, highlighting the need for co-design approaches. Pathways  
42  
43 44 were identified as a tool that used in combination with other tools may help enhance cancer diagnosis,  
44  
45 45 with the goals of improving patient outcomes and care experience.  
46  
47  
48  
49

50 46

51 47

52 48  
53  
54  
55  
56  
57  
58  
59  
60

## 49 Introduction

50 In Canada, the process of obtaining a cancer diagnosis following first suspicion of a problem can be  
51 fraught with delay (1-5), which is associated with shorter survival, decreased quality of life post-  
52 treatment, and suboptimal patient experience (2, 6). Delays may be caused by various factors related to  
53 the characteristics of cancer, to the patient, and to the fragmented healthcare system (5, 7, 8). There is a  
54 set of standard tests and steps required to get to diagnosis, and the coordination of these mostly rests in  
55 the hands of family physicians (1, 5, 9).

56  
57 Care pathways are tools that can help family physicians navigate the diagnostic process (10), and  
58 potentially result in enhanced quality of care and efficiencies in the healthcare system (11-15). While  
59 some studies in Alberta and Canada suggest that family physicians are interested in and follow pathways  
60 in their everyday practice (16), others suggest important challenges related to how pathways might be  
61 adopted, approached and used (17). Some authors report low uptake due to little consideration of how  
62 family physicians approach their work during pathway design (18, 19). There is a need to rethink the  
63 process of designing and implementing pathways in the primary care setting (20, 21). This study was  
64 intended to take a first step at addressing that need in the context of cancer diagnosis. The objective  
65 was to examine the mental models associated with using care pathways for cancer diagnosis of a group  
66 of family physicians in Alberta, and applying the findings to guide integration of pathways into family  
67 physicians' practices.

## 69 Methods

### 70 Design

71 We conducted a qualitative study using Cognitive Task Analysis (CTA). CTA is designed to elicit the  
72 mental processes that underlie observable behaviours and reveal the cognitive skills and strategies

1  
2  
3 73 needed to effectively tackle challenging situations and accomplish tasks in real-world settings (22, 23). It  
4  
5 74 uses specialized interview methods and a framework-guided analysis to uncover and represent what  
6  
7 75 individuals know and how they think when making decisions or performing tasks, which is known as  
8  
9  
10 76 'macrocognition' (22).

11  
12 77  
13  
14 78 We used the mental simulation method of CTA, with a "think-aloud" protocol. Mental simulation allows  
15  
16 79 participants to consider events or scenarios, and learn of possible consequences, results, and futures  
17  
18 80 (24). The "think aloud" process is a method used for developing and testing new clinical systems (in this  
19  
20 81 case, care pathways). It encourages participants to talk through their use of the system in order to  
21  
22 82 assess participants' information retrieval needs, their reasoning in how they use the system, and the  
23  
24 83 usability of how the system fits within existing workflows (25).  
25  
26  
27  
28 84

### 29 30 85 **Setting and participants**

31  
32 86 We used purposive sampling (26) to recruit family physicians whose practices were not heavily oriented  
33  
34 87 toward cancer patients and who did not work closely with specialized cancer clinics. We posted notices  
35  
36 88 in the provincial newsletters of the Alberta Medical Association (AMA), and relied on our familiarity with  
37  
38 89 Alberta's Primary Care Networks and practices to purposely target physicians who would be most  
39  
40 90 representative of real-world users (27). All physicians expressing interest in the study participated in it.  
41  
42 91 Fee-for-service physicians were offered a stipend to compensate their time for participation, based on  
43  
44 92 established provincial guidelines.  
45  
46  
47  
48 93

### 49 50 94 **Data sources and collection**

51  
52 95 Data sources were CTA interviews from simulation exercises that used three examples of care pathways  
53  
54 96 for cancer diagnosis recently developed for use in Alberta: rectal bleeding, iron deficiency anemia, and  
55  
56  
57  
58  
59  
60

1  
2  
3 97 suspected lymphoma. Each simulation asked the participant to choose one pathway based on a recent  
4  
5 98 case where they could have used that pathway. Participants were asked to recall that case, and think  
6  
7 99 aloud about how they would have cared for that patient using the pathway. We used a list of interview  
8  
9  
10 100 probes derived from macrocognition theory to ensure that key information was elicited (28-30). We  
11  
12 101 gathered information on: 1) how the proposed pathways affected the family physicians' macrocognitive  
13  
14 102 functions; 2) the fit between the family physicians' mental models of diagnostic processes and the  
15  
16 103 proposed pathways; and 3) the use of the pathways (25, 28-30) (Appendix 1). Interview guides were  
17  
18 104 developed by the research team based on their previous work in the area (1, 17, 31, 32). Interviews  
19  
20 105 were conducted by an interviewer and a note-taker, who were members of the AMA-Accelerating  
21  
22 106 Change Transformation Team (ACTT) trained in CTA and might have previously interacted with some of  
23  
24 107 the participants through their work. Individual interviews took place virtually by Zoom, in February and  
25  
26 108 March of 2021, after informed consent was granted. No repeat interviews were conducted. Transcripts  
27  
28 109 were not returned to participants for comment and/or correction, as they rarely are in CTA; however,  
29  
30 110 participants were notified that they may be contacted with clarifying questions.  
31  
32  
33  
34  
35

### 36 111 37 112 **Data analysis**

38  
39 113 All interviews were audio-recorded, transcribed verbatim, combined with field notes, and imported into  
40  
41 114 Excel for analysis. The text was divided into sections, and each section was coded using a coding  
42  
43 115 framework from macrocognition theory used in our previous CTA studies (17, 31) (Table 1). In addition,  
44  
45 116 emergent themes were identified using thematic analysis (33). Coding of each section was completed by  
46  
47 117 two CTA-trained members of AMA-ACTT. Members were assigned to sections so that the same two  
48  
49 118 members did not code together each time. To ensure consistency and trustworthiness (33), AMA-ACTT  
50  
51 119 and research team members met to review and discuss the coding, resolving any disagreements by  
52  
53 120 consensus. We then met to review all the narrative summaries of the macrocognitive functions, plus  
54  
55  
56  
57  
58  
59  
60

1  
2  
3 121 emergent findings, to build a description of each participant's mental model of their cognitive approach  
4  
5 122 to using clinical diagnostic pathways, and finally to compile similarities and contrasts across participants.  
6  
7  
8 123

9  
10 124 **Ethics approval**

11  
12 125 Ethics approval was received from the Health Research Ethics Board of Alberta, Cancer Committee  
13  
14 126 (HREBA.CC-21-0003).  
15  
16 127

17  
18  
19 128 **Results**

20  
21 129 We interviewed eight family physicians (Table 2). Interviews lasted 45-60 min. Four chose the rectal  
22  
23 130 bleeding pathway, three the iron deficiency anemia pathway, and one the suspected lymphoma  
24  
25 131 pathway. Two also provided additional comments on the pathways they did not choose (iron deficiency  
26  
27 132 and lymphoma). The analysis identified the macrocognitive functions most used and physicians' mental  
28  
29 133 models (4 subthemes), as well as the actual use of the pathways (4 subthemes). Illustrative quotations  
30  
31 134 for subthemes are provided in Tables 3 and 4.  
32  
33  
34 135

35  
36  
37 136 **Macrocognitive functions and mental models**

38  
39 137 The pathways influenced participants' sensemaking and learning (Table 1) the most. Participants used  
40  
41 138 the pathways to gather information, confirm what they already knew, support what they were doing, or  
42  
43 139 as a quick guide for what steps to take when unsure. This was particularly true for the rectal bleeding  
44  
45 140 and iron deficiency anemia pathways, which were related to common health issues seen by physicians  
46  
47 141 regularly. Physicians had well-developed mental models of the diagnostic process in these cases, and  
48  
49 142 described using the pathways as a quick confirmation or validation tool (Table 3, Subtheme 1). In the  
50  
51 143 case of the lymphoma pathway, a less common issue experienced by study participants, physicians did  
52  
53 144 not have a well-developed mental model of the diagnostic process, and would use the pathway for  
54  
55  
56  
57  
58  
59  
60

1  
2  
3 145 guidance and support, as well as confidence or reinforcement in making decisions about the diagnostic  
4  
5 146 and referral processes (Table 3, Subtheme 2).  
6  
7  
8 147

9  
10 148 In some cases, participants stated that they would use the pathways for sensegiving to patients, either  
11  
12 149 to show them that a process exists and where they are within that process, or to provide information in  
13  
14 150 the form of patient handouts (Table 3, Subtheme 3). Some participants went further to note that they  
15  
16 151 would find it useful to have a patient version of the pathway, with information on procedures and side  
17  
18 152 effects, that were easy to find and printable (Table 3, Subtheme 3.1).  
19  
20

21 153  
22  
23 154 Referring to all pathways, participants mentioned that pathways could help care coordination and  
24  
25 155 decision-making. Participants perceived that there is no agreement among family physicians and  
26  
27 156 specialists (as well as among specialists themselves), about what is considered a “high risk” scenario,  
28  
29 157 which determines if referrals are “semi-urgent” or “urgent”. Pathways were expected to inform or  
30  
31 158 validate decision-making in regards to referral priority; however, with uncertainty about risk, and  
32  
33 159 without clarity about urgency, the majority stated they would simply “pick up the phone and call a  
34  
35 160 specialist”, to avoid a potential miss of cancer diagnosis (Table 3, Subtheme 4).  
36  
37  
38

#### 39 161 40 41 162 **Use of the pathways**

42  
43 163 Participants demonstrated that the pathways presented in this study are not tools they would  
44  
45 164 necessarily use for all patients. Participants explained that for common health issues, they had already  
46  
47 165 developed an approach, and relied upon existing, more generic tools to inform diagnostic decisions (e.g.,  
48  
49 166 [TOP Guidelines](#), [Specialist Link](#), [UpToDate](#)). Participants reported that if they were to use pathways  
50  
51 167 guiding the diagnostic process, they would only use them to complement the tools they typically use  
52  
53 168 (Table 4, Subtheme 1).  
54  
55  
56  
57  
58  
59  
60

1  
2  
3 169  
4  
5 170 Participants indicated that the most valuable use of the pathways was to support and guide the referral  
6  
7  
8 171 process. Firstly, pathways could act as a platform to build a shared understanding between family and  
9  
10 172 specialist physicians of what “high risk” means and when to send a referral for “semi-urgent” or  
11  
12 173 “urgent” treatment. Secondly, pathways could provide steps to guide the referral process, including  
13  
14 174 criteria and requirements, when and to whom to refer. Some participants proposed that pathways could  
15  
16 175 even be part of the referral process itself by being a clickable form that could be submitted for referral.  
17  
18  
19 176 Participants indicated this may help improve time to diagnosis, and communication and care  
20  
21 177 coordination with specialists (Table 4, Subtheme 2).  
22  
23 178  
24  
25 179 Although the pathways are presented as an algorithm, participants would not use them algorithmically.  
26  
27  
28 180 In the time-pressured primary care setting, physicians emphasized their need to access and process  
29  
30 181 information quickly. The participants walked us through how they would rapidly review the pathways to  
31  
32 182 identify recognizable patterns or the minimum information necessary to make decisions, confirm  
33  
34 183 knowledge, guide what steps to take when unsure, or build new patterns to drive a satisfactory decision.  
35  
36  
37 184 They emphasized they typically would only access the information in the first page, which should  
38  
39 185 present the most valuable information in a very concise and user-friendly way (Table 4, Subtheme 3).  
40  
41 186 Last, the majority of participants stated that the pathways needed to be located on the same webpage,  
42  
43 187 and easy to find. A few participants noted that having access to the pathways through their electronic  
44  
45 188 medical records (EMR) would be ideal (Table 4, Subtheme 4).  
46  
47

48 189

### 49 190 **Interpretation**

51  
52 191 Pathways presented for the study had little effect on participants’ diagnostic process beyond  
53  
54 192 sensemaking and learning, some diagnostic decision-making, and potentially care coordination.  
55  
56  
57  
58  
59  
60



1  
2  
3 193 Pathways did not conflict with participants' mental models, meaning that they could fit within their  
4  
5 194 diagnostic and referral processes. Findings suggested that family physicians might use pathways to  
6  
7 195 gather information, confirm or validate what they already know, support what they are already doing, as  
8  
9  
10 196 a quick reference for steps to take when unsure, complementing tools they already use.

11  
12 197  
13  
14 198 Our findings align well with and help explain previous studies reporting low uptake of pathways in  
15  
16 199 primary care, even though family physicians see them as highly relevant (34). Evidence on successful  
17  
18 200 pathway implementation is not abundant (20), and mostly refers to barriers and facilitators related to  
19  
20  
21 201 the contextual factors linked to patients (e.g., epidemiological, socio-economic, political, ethical  
22  
23 202 aspects), healthcare providers (knowledge, attitudes, behaviour), and work environment (e.g.,  
24  
25 203 inadequate staffing, time pressure) (21). Our results elaborate on factors related to family physicians,  
26  
27 204 and suggest that uptake will not succeed if pathways conflict with physicians' cognitive work strategies.  
28  
29  
30 205 While pathways were presented as algorithms, family physicians used them as resources to support  
31  
32 206 well-known System 1 thinking strategies, which are rapid, efficient, and heuristic-based in contrast to  
33  
34 207 slow, effortful "reasoning from first principles" System 2 thinking (35). Participants used pattern  
35  
36 208 recognition and satisficing approaches (36) to quickly find the minimum information necessary to make  
37  
38 209 a satisfactory decision, or to confirm that their decision was appropriate. It is crucial that future design  
39  
40  
41 210 of primary care pathways takes into account the cognitive implications of the primary care time-  
42  
43 211 pressured context, in which family physicians, in order to quickly work through the issue at hand, are  
44  
45 212 heavily dependent on fast automatic and instinctive thinking strategies.

46  
47  
48 213  
49  
50 214 In Alberta, care pathways have been identified by the Strategic Clinical Networks (networks of clinicians  
51  
52 215 and patients with knowledge about a specific health area) at Alberta Health Services as a preferred  
53  
54 216 strategy to improve the quality of care provided to Albertans (37, 38). Findings from our study provide  
55  
56  
57  
58  
59  
60

1  
2  
3 217 two relevant considerations related to this. First, they suggest that pathways should be co-designed with  
4  
5 218 the intended physician end-users. Post-implementation solutions to promote pathway uptake and use,  
6  
7 219 such as dissemination strategies (39), training activities (40-42), or additional materials like explanatory  
8  
9 220 handbooks (43), may not support successful implementation, at least not by themselves. Pathway  
10  
11 221 design should include the meaningful involvement of physician end-users and explicit examination of  
12  
13 222 their cognitive work patterns in order to fulfill their information needs, while increasing the likelihood of  
14  
15 223 seamless incorporation into their workflow. Second, findings suggest that pathways may need to be  
16  
17 224 complemented by other tools. In the context of cancer care, where pathways are identified as a tool to  
18  
19 225 support enhanced diagnosis of cancer (44), participants reported that they would refer their patients to  
20  
21 226 a specialist when there was any chance of cancer, even if minimal, and mentioned the lack of shared  
22  
23 227 understanding and poor communication with specialists. In alignment with current discussions on poor  
24  
25 228 care continuity and inconsistent collaboration between family physicians and other specialists (5, 9, 45,  
26  
27 229 46), our findings emphasized the importance of pathways, while also suggesting the need additional  
28  
29 230 improved supports for family physicians. A previous study by this team (1) reported that family  
30  
31 231 physicians and cancer specialists supported the implementation of a centralized service where primary  
32  
33 232 and specialist physicians converge in their roles. Pathways, low-risk guides, and other initiatives such as  
34  
35 233 rapid access clinics (47, 48) and specialty teleconsultation systems (16) could be considered.  
36  
37  
38  
39  
40  
41  
42

### 43 235 **Limitations**

44  
45 236 Given resource constraints, we opted to interview participants in-depth, gathering significant and  
46  
47 237 meaningful information, rather than reaching data saturation. An additional limitation is that  
48  
49 238 participants did not represent a diversity of profiles. Most practiced medicine in urban centres and were  
50  
51 239 located in Southern Alberta. As such, findings might not reflect the views of family physicians in rural  
52  
53 240 and remote communities of Alberta, and those of the north and central parts of the province.  
54  
55  
56  
57  
58  
59  
60

1  
2  
3 2414  
5 242 **Conclusion**

6  
7 243 In this study we found that family physicians might use pathways developed for primary care, but not  
8  
9  
10 244 necessarily in the manner intended. Findings highlight the need to use co-design approaches to develop  
11  
12 245 pathways, ensuring that the information needs and cognitive strategies of family physicians are  
13  
14 246 accounted for. Findings also underline the need to think about cancer diagnosis pathways not as ‘the  
15  
16 247 tool’ to guarantee improved diagnosis of cancer, but as ‘one tool’ that may be used in combination with  
17  
18 248 other tools to help enhance cancer diagnosis. Future studies should explore and rigorously assess  
19  
20 249 existing and innovative approaches to develop pathways and additional supports that can be easily  
21  
22 250 integrated into family physicians’ practices.  
23  
24

25 251

26  
27  
28 252 **Acknowledgements**

29  
30 253 The authors acknowledge the Alberta Medical Association for their assistance with recruiting  
31  
32 254 participants, and the Alberta Medical Association - Accelerating Change Transformation Team for their  
33  
34 255 help with data collection and analysis. The authors also acknowledge study participants for their time  
35  
36 256 and valuable insights.  
37  
38

39 257

40  
41 25842  
43 259  
44  
45  
46  
47  
48  
49  
50  
51  
52  
53  
54  
55  
56  
57  
58  
59  
60

1  
2  
3 260 **References**  
4

- 5 261 1. Pujadas Botey A, GermAnn K, Robson PJ, O'Neill BM, Stewart DA. Physician perspectives on  
6  
7 262 delays in cancer diagnosis in Alberta: a qualitative study. *CMAJ Open*. 2021;9(4):E1120-E7.  
8  
9 263 2. Brousselle A, Breton M, Benhadj L, Tremblay D, Provost S, Roberge D, et al. Explaining time  
10  
11 264 elapsed prior to cancer diagnosis: Patients' perspectives. *BMC Health Serv Res*. 2017;17:448.  
12  
13 265 3. Yuan Y, Li M, Yang J, Elliot T, Dabbs K, Dickinson JA, et al. Factors related to breast cancer  
14  
15 266 detection mode and time to diagnosis in Alberta, Canada: A population-based retrospective cohort  
16  
17 267 study. *BMC Health Serv Res*. 2016;16.  
18  
19 268 4. Sikdar KC, Dickinson J, Winget M. Factors associated with mode of colorectal cancer detection  
20  
21 269 and time to diagnosis: A population level study. *BMC Health Serv Res*. 2017;17.  
22  
23 270 5. Grunfeld E. The two solitudes of primary care and cancer specialist care: Is there a bridge?  
24  
25 271 *Current Oncology*. 2017;25(2):69-70.  
26  
27 272 6. Neal RD, Tharmanathan P, France B, Din NU, Cotton S, Fallon-Ferguson J, et al. Is increased time  
28  
29 273 to diagnosis and treatment in symptomatic cancer associated with poorer outcomes? Systematic review.  
30  
31 274 *Br J Cancer*. 2015;112:S92-S107.  
32  
33 275 7. Scott SE, Walter FM, Webster A, Sutton S, Emery J. The model of pathways to treatment:  
34  
35 276 Conceptualization and integration with existing theory. *Br J Health Psychol*. 2013;18(1):45-65.  
36  
37 277 8. Walter F, Webster A, Scott S, Emery J. The Andersen Model of Total Patient Delay: a systematic  
38  
39 278 review of its application in cancer diagnosis. *J Health Serv Res Policy*. 2012;17(2):110-8.  
40  
41 279 9. Easley J, Miedema B, O'Brien MA, Carroll J, Manca D, Webster F, et al. The role of family  
42  
43 280 physicians in cancer care: Perspectives of primary and specialty care providers. *Current Oncology*.  
44  
45 281 2017;24(2):75-80.  
46  
47 282 10. Kinsman L, Rotter T, James E, Snow P, Willis J. What is a clinical pathway? Development of a  
48  
49 283 definition to inform the debate. *BMC Med*. 2010;8:31.  
50  
51  
52  
53  
54  
55  
56  
57  
58  
59  
60

- 1  
2  
3 284 11. Whittle C, Hewison A. Integrated care pathways: pathways to change in health care? Journal of  
4  
5 285 health organization and management. 2007;21(3):297-306.  
6  
7 286 12. Scott SD, Grimshaw J, Klassen TP, Nettel-Aguirre A, Johnson DW. Understanding implementation  
8  
9 287 processes of clinical pathways and clinical practice guidelines in pediatric contexts: a study protocol.  
10  
11 288 Implementation science : IS. 2011;6:133.  
12  
13  
14 289 13. Palmer KS, Brown AD, Evans JM, Marani H, Russell KK, Martin D, et al. Standardising costs or  
15  
16 290 standardising care? Qualitative evaluation of the implementation and impact of a hospital funding  
17  
18 291 reform in Ontario, Canada. Health Res Policy Syst. 2018;16(1).  
19  
20  
21 292 14. Rotter T, Kinsman L, James E, Machotta A, Steyerberg EW. The quality of the evidence base for  
22  
23 293 clinical pathway effectiveness: room for improvement in the design of evaluation trials. BMC Med Res  
24  
25 294 Methodol. 2012;12:80.  
26  
27  
28 295 15. Rotter T, Kinsman L, James E, Machotta A, Gothe H, Willis J, et al. Clinical pathways: effects on  
29  
30 296 professional practice, patient outcomes, length of stay and hospital costs. Cochrane Database Syst Rev.  
31  
32 297 2010(3):Cd006632.  
33  
34  
35 298 16. Arain M, Rostami M, Zaami M, Kiss V, Ward R. Specialist LINK and primary care network clinical  
36  
37 299 pathways - a new approach to patient referral: A cross-sectional survey of awareness, utilization and  
38  
39 300 usability among family physicians in Calgary. BMC Fam Pract. 2020;21(1).  
40  
41  
42 301 17. Wagner KK, Austin J, Toon L, Barber T, Green LA. Differences in Team Mental Models Associated  
43  
44 302 With Medical Home Transformation Success. Ann Fam Med. 2019;17(Suppl 1):S50-s6.  
45  
46 303 18. Ford E, Edelman N, Somers L, Shrewsbury D, Lopez Levy M, van Marwijk H, et al. Barriers and  
47  
48 304 facilitators to the adoption of electronic clinical decision support systems: a qualitative interview study  
49  
50 305 with UK general practitioners. BMC Med Inform Decis Mak. 2021;21(1):193.  
51  
52  
53  
54  
55  
56  
57  
58  
59  
60

- 1  
2  
3 306 19. Donald M, McBrien K, Jackson W, Manns BJ, Tonelli M, King-Shier K, et al. Development and  
4  
5 307 implementation of an online clinical pathway for adult chronic kidney disease in primary care: a mixed  
6  
7 308 methods study. BMC Med Inform Decis Mak. 2016;16:1-11.  
8  
9  
10 309 20. Elliott MJ, Gil S, Hemmelgarn BR, Manns BJ, Tonelli M, Jun M, et al. A scoping review of adult  
11  
12 310 chronic kidney disease clinical pathways for primary care. Nephrol Dial Transplant. 2017;32(5):838-46.  
13  
14 311 21. Seckler E, Regauer V, Rotter T, Bauer P, Müller M. Barriers to and facilitators of the  
15  
16 312 implementation of multi-disciplinary care pathways in primary care: a systematic review. BMC Fam  
17  
18 313 Pract. 2020;21(1):113.  
19  
20  
21 314 22. Crandall B, Klein GA, Hoffman RR. Working minds: a practitioner's guide to cognitive task  
22  
23 315 analysis: MIT Press; 2006.  
24  
25 316 23. Potworowski G, Green L. Cognitive task analysis: Methods to improve patient-centered medical  
26  
27 317 home models by understanding and leveraging its knowledge work. Rockville, MD: Agency for  
28  
29 318 Healthcare Research and Quality; 2013.  
30  
31  
32 319 24. Crandall B, Klein G, Hoffman R. Working Minds: a Practitioner's Guide to Cognitive Task Analysis.  
33  
34 320 Cambridge, Massachusetts: The MIT Press; 2006.  
35  
36  
37 321 25. Jaspers MWM, Steen T, van den Bos C, Geenen M. The think aloud method: A guide to user  
38  
39 322 interface design. Int J Med Inform. 2004;73(11-12):781-95.  
40  
41 323 26. Given LM, editor. The SAGE Encyclopedia of Qualitative Methods. Los Angeles, California: Sage  
42  
43 324 Publications; 2008.  
44  
45  
46 325 27. Rogers EM. Diffusion of innovations. Fifth edition. Free Press trade paperback edition. ed: Free  
47  
48 326 Press; 2003.  
49  
50 327 28. Klein G, Wright C. Macrocognition: From theory to toolbox. Front Psychol. 2016;7(JAN).  
51  
52 328 29. Klein G, Ross KG, Moon BM, Klein DE, Hoffman RR, Hollnagel E. Macrocognition. IEEE Intelligent  
53  
54 329 Systems. 2003;18(3):81-5.  
55  
56  
57  
58  
59  
60

- 1  
2  
3 330 30. Patterson ES, Miller JE. Macrocognition metrics and scenarios. [electronic resource]: Design and  
4  
5 331 evaluation for real-world teams: Ashgate; 2010.
- 6  
7 332 31. Barber T, Sharif B, Teare S, Miller J, Shewchuk B, Green LA, et al. Qualitative study to elicit  
8  
9 333 patients' and primary care physicians' perspectives on the use of a self-management mobile health  
10  
11 334 application for knee osteoarthritis. *BMJ Open*. 2019;9(1):e024016.
- 12  
13 335 32. Barber T, Toon L, Tandon P, Green LA. Eliciting and Understanding Primary Care and Specialist  
14  
15 336 Mental Models of Cirrhosis Care: A Cognitive Task Analysis Study. *Canadian Journal of Gastroenterology*  
16  
17 337 and Hepatology. 2021;2021:5582297.
- 18  
19 338 33. Miles MB, Huberman MA, Saldana J. *Qualitative data analysis: A methods sourcebook*. 3rd ed.  
20  
21 339 Thousand Oaks, CA: SAGE Publications, Inc; 2014.
- 22  
23 340 34. Toy JM, Drechsler A, Waters RC. Clinical pathways for primary care: current use, interest and  
24  
25 341 perceived usability. *Journal of the American Medical Informatics Association : JAMIA*. 2018;25(7):901-6.
- 26  
27 342 35. Kahneman D. *Thinking, Fast and Slow*. New York: Farrar, Straus and Giroux; 2013.
- 28  
29 343 36. Marewski JN, Gigerenzer G. Heuristic decision making in medicine. *Dialogues Clin Neurosci*.  
30  
31 344 2012;14(1):77-89.
- 32  
33 345 37. Alberta Health Services. *Alberta Health Services: Strategic Clinical Networks. A Primer & Working*  
34  
35 346 *Document (August 7, 2012 – V5)*. 2012.
- 36  
37 347 38. Wasylak T, Strilchuk A, Manns B. Strategic Clinical Networks: From pilot to practice change to  
38  
39 348 planning for the future. *CMAJ*. 2019;191(Suppl):S54-S6.
- 40  
41 349 39. Grol R, Grimshaw J. From best evidence to best practice: effective implementation of change in  
42  
43 350 patients' care. *Lancet*. 2003;362(9391):1225-30.
- 44  
45 351 40. Bleijenberg N, Ten Dam VH, Steunenberg B, Drubbel I, Numans ME, De Wit NJ, et al. Exploring  
46  
47 352 the expectations, needs and experiences of general practitioners and nurses towards a proactive and  
48  
49  
50  
51  
52  
53  
54  
55  
56  
57  
58  
59  
60

- 1  
2  
3 353 structured care programme for frail older patients: a mixed-methods study. *J Adv Nurs*.  
4  
5 354 2013;69(10):2262-73.  
6  
7 355 41. van Bruggen R, Gorter KJ, Stolk RP, Verhoeven RP, Rutten GE. Implementation of locally adapted  
8  
9 guidelines on type 2 diabetes. *Fam Pract*. 2008;25(6):430-7.  
10 356  
11  
12 357 42. Donald M, Smekal MD, Elliott MJ, McBrien K, Weaver RG, Manns BJ, et al. Online clinical  
13  
14 358 pathway for chronic kidney disease management in primary care: a retrospective cohort study. *BMC*  
15  
16 359 *Nephrol*. 2021;22(1).  
17  
18 360 43. Melis RJ, van Eijken MI, Teerenstra S, van Achterberg T, Parker SG, Borm GF, et al. A randomized  
19  
20 361 study of a multidisciplinary program to intervene on geriatric syndromes in vulnerable older people who  
21  
22 362 live at home (Dutch EASYcare Study). *J Gerontol A Biol Sci Med Sci*. 2008;63(3):283-90.  
23  
24 363 44. Canadian Partnership against Cancer. Leading practices to create a seamless patient experience  
25  
26 364 for the pre-diagnosis phase of care: An environmental scan. 2018.  
27  
28 365 45. Brouwers MC, Vukmirovic M, Tomasone JR, Grunfeld E, Urquhart R, O'Brien MA, et al.  
29  
30 366 Documenting coordination of cancer care between primary care providers and oncology specialists in  
31  
32 367 Canada. *Can Fam Physician*. 2016;62(10):E616-E25.  
33  
34 368 46. Health Quality Council of Alberta. Continuity of patient care study. Edmonton 2013 December  
35  
36 369 19, 2013.  
37  
38 370 47. Brouwers M, Oliver TK, Crawford J, Ellison P, Evans WK, Gagliardi A, et al. Cancer diagnostic  
39  
40 371 assessment programs: Standards for the organization of care in Ontario. *Current Oncology*.  
41  
42 372 2009;16(6):29-41.  
43  
44 373 48. Vos LJ, Ho CK, Donnelly BJ, Reuther JD, Kerba M. A population-based study examining the  
45  
46 374 influence of a specialized rapid-access cancer clinic on initial treatment choice in localized prostate  
47  
48 375 cancer. *Canadian Urological Association Journal*. 2018;12(7):E314-E7.  
49  
50  
51  
52  
53  
54  
55 376



1  
2  
3 377 **Tables**  
4

5 378 Table 1. Macro cognition framework  
6

7 379 Table 2. Participant demographics (n=8)  
8

9  
10 380 Table 3. Illustrative quotations from data generated by CTA interviews with family physicians related to  
11  
12 381 macrocognitive functions and mental models  
13

14 382 Table 4. Illustrative quotations from data generated by CTA interviews with family physicians related to  
15  
16 383 the use of pathways  
17

18  
19 384

20  
21 385 **Supplementary files**  
22

23 386 Appendix 1. Interview guide  
24  
25  
26  
27  
28  
29  
30  
31  
32  
33  
34  
35  
36  
37  
38  
39  
40  
41  
42  
43  
44  
45  
46  
47  
48  
49  
50  
51  
52  
53  
54  
55  
56  
57  
58  
59  
60

Confidential

Table 1. Macro cognition framework

| Function                                                 | Description                                                                                                                                                                                                                                                                                                              |
|----------------------------------------------------------|--------------------------------------------------------------------------------------------------------------------------------------------------------------------------------------------------------------------------------------------------------------------------------------------------------------------------|
| Sensemaking and learning                                 | <ul style="list-style-type: none"> <li>- Deliberate attempt to find coherent situational understanding</li> <li>- Modifying a mental model or generating a new one</li> <li>- Includes sensegiving (presenting an understanding to others to adopt)</li> </ul>                                                           |
| Decision-making                                          | <ul style="list-style-type: none"> <li>- Decisions in, or about, patient care and administrative processes</li> </ul>                                                                                                                                                                                                    |
| Planning and re-planning                                 | <ul style="list-style-type: none"> <li>- Shaping or reshaping patient care or administrative processes</li> </ul>                                                                                                                                                                                                        |
| Monitoring and problem detection                         | <ul style="list-style-type: none"> <li>- Tracking the progress or outcomes of patient care or administrative processes</li> <li>- Planned, ad hoc (“noticing”), formal (data collection), or informal</li> </ul>                                                                                                         |
| Managing the unknown, unclear, unexpected, and irregular | <ul style="list-style-type: none"> <li>- Planned or anticipatory (contingencies, fallbacks)</li> <li>- Evaluating/estimating risks</li> <li>- Unplanned, “scrambling”</li> </ul>                                                                                                                                         |
| Coordinating                                             | <ul style="list-style-type: none"> <li>- Any activity that helps synchronize two or more individuals in a patient care or administrative process, especially transmitting information or expectations</li> <li>- Maintenance of “common ground,” shared expectations/understanding/mental models of processes</li> </ul> |

Table 2. Participant demographics (n=8)

| Characteristic                      | Frequency<br>n (%) |
|-------------------------------------|--------------------|
| Gender                              |                    |
| Woman                               | 6 (75)             |
| Man                                 | 2 (25)             |
| Age (years)                         |                    |
| 30-39                               | 6 (75)             |
| 50-59                               | 2 (25)             |
| Years in practice                   |                    |
| 6-10                                | 6 (75)             |
| 29-33                               | 2 (25)             |
| Geographic location of practice (*) |                    |
| Southern Alberta, urban             | 6 (75)             |
| Northern Alberta, urban             | 2 (25)             |

(\*) Locations are classified based on Alberta Health Services and Alberta Health Standard Guidelines.

Urban centre have a population of 25,000 or more, and rural centres have population of less than 25,000.

Table 3. Illustrative quotations from data generated by CTA interviews with family physicians related to macrocognitive functions and mental models

| Macrocognitive function & subtheme                                                       | Quotations                                                                                                                                                                                                                                                                                                                                                                                                                                                                                                                                                                                                                                                                                                                                                                                                                                                                                                          |
|------------------------------------------------------------------------------------------|---------------------------------------------------------------------------------------------------------------------------------------------------------------------------------------------------------------------------------------------------------------------------------------------------------------------------------------------------------------------------------------------------------------------------------------------------------------------------------------------------------------------------------------------------------------------------------------------------------------------------------------------------------------------------------------------------------------------------------------------------------------------------------------------------------------------------------------------------------------------------------------------------------------------|
| <p>1. Sensemaking &amp; learning: Confirmation and validation (common health issues)</p> | <p>I'd probably, just given my experience, I would see the patient and probably open this up after just to glance through to see, have I thought of everything I should? Almost like a checklist to make sure I haven't missed anything. FP7</p> <p>I think what it would have done is just confirmed for me that I was doing the right thing. FP3</p> <p>All of the pathways, for me, it gives me a framework to go off of. How do I go through the process in my mind in terms of what's the differential? ... Just reminding myself what are the alarm features? When do I have to be really worried? ...It is good to have that framework. It gives us more reassurance. So much of family practice is uncertainty and dealing with uncertainty. And dealing with very big symptoms to start with. They don't come in and say, "Oh, I have rectal cancer." You are trying to sort through the symptoms. FP1</p> |

|                                                                                                      |                                                                                                                                                                                                                                                                                                                                                                                                                                                                                                                                                                                                                                                                                                                        |
|------------------------------------------------------------------------------------------------------|------------------------------------------------------------------------------------------------------------------------------------------------------------------------------------------------------------------------------------------------------------------------------------------------------------------------------------------------------------------------------------------------------------------------------------------------------------------------------------------------------------------------------------------------------------------------------------------------------------------------------------------------------------------------------------------------------------------------|
| <p>2. Sensemaking &amp; learning, decision-making: Guidance and support (uncommon health issues)</p> | <p>I'd say all of it [use of lymphoma Pathway], because I do struggle in this area. It's uncommon, so I don't have as much experience or comfort level with it, so I would [use it], especially the "clinical exam". FP8</p> <p>It [Pathway] would make a difference... I'll be seeing the patient next week. I'll be able to say, "Listen, I've sent this to the Lymphoma Diagnosis Program and they are going to call you." I know with confidence that I'm sending the patient to the right place. FP2</p>                                                                                                                                                                                                          |
| <p>3. Sensemaking &amp; learning: Sensegiving to patients</p>                                        | <p>...if there is a patient that is insisting on seeing the specialist then I'll use the algorithm and say, "Actually, we have something that we follow. This is a pathway that we follow and the specialist won't see you until we follow through this pathway to the end where we need to go. And then, if something comes up, there are indications when I have to send you to the specialist, but we have to work through this together before we get to that point". FP1</p> <p>Handouts for patients are the best. ...I definitely would still share this with them. You just have to spend the time to go through each thing with them and make notes and give it to them so they can refer back to it. FP4</p> |
| <p>3.1. Sensemaking &amp; learning: Sensegiving to patients -</p>                                    | <p>...a tool that followed the algorithm that we were following, so they [patients] would know what steps we were going through and when it is a problem, when to reconnect. FP1</p> <p>Often patients will experience some side effects the first couple of weeks and they will go away, so that is good for them to know. I don't necessarily give them a</p>                                                                                                                                                                                                                                                                                                                                                        |

|                                                                               |                                                                                                                                                                                                                                                                                                                                                                                                                                                                                                                                                                                                                                                                                                                                                                                                                                                                                                                                                                                                            |
|-------------------------------------------------------------------------------|------------------------------------------------------------------------------------------------------------------------------------------------------------------------------------------------------------------------------------------------------------------------------------------------------------------------------------------------------------------------------------------------------------------------------------------------------------------------------------------------------------------------------------------------------------------------------------------------------------------------------------------------------------------------------------------------------------------------------------------------------------------------------------------------------------------------------------------------------------------------------------------------------------------------------------------------------------------------------------------------------------|
| <p>patient version<br/>of pathways</p>                                        | <p>handout about that, but could I? Absolutely I could. Maybe it would just make me feel better that they have absorbed and understood that information... I think information about procedures is probably harder to find, so I think that is good.</p> <p>When I order a specialized test, sometimes patients want to know a bit more about that. It helps alleviate their anxiety as well. FP5</p> <p>The patient handouts... it is hard to actually find the right ones. ...I think having handouts direct from AHS would be a great thing. Also, with instructions... "Your doctor has referred you to here and you should be hearing from this particular place" or something within this timeline. FP6</p>                                                                                                                                                                                                                                                                                          |
| <p>4.<br/>Coordination,<br/>decision<br/>making: Shared<br/>understanding</p> | <p>...one is "Urgent". One is "Semi-urgent." ...I think is a bit confusing to be honest because this is all the same thing in my opinion. Only because as primary care physicians, we don't really dictate when the person is going to be scoped or not, so "two weeks" or "eight weeks" unless they are bleeding... if you are looking for "Urgent" they should be picking up the phone and calling. FP4</p> <p>"Semi-urgent criteria". Yes, that was pretty much what we fall into. I then just did the referral, although I marked it as urgent. Urgent, I suppose, when I mark a referral I'm just faxing through, I'm not expecting it to be necessarily quicker than that two months. If I'm thinking this needs to be seen in next week or two, that's when I'm picking up the phone and speaking to someone. FP3</p> <p>Sometimes you have to go with your gut feeling though or refer them anyway, because it is better to rule out the cancer than to find out it was and it's too late... I</p> |

1  
2  
3  
4  
5  
6  
7  
8  
9  
10  
11  
12  
13  
14  
15  
16  
17  
18  
19  
20  
21  
22  
23  
24  
25  
26  
27  
28  
29  
30  
31  
32  
33  
34  
35  
36  
37  
38  
39  
40  
41  
42  
43  
44  
45  
46  
47  
48  
49  
50  
51  
52  
53  
54  
55  
56  
57  
58  
59  
60

|  |                                                                                                              |
|--|--------------------------------------------------------------------------------------------------------------|
|  | may not fully always go to the "T", because if you think this is cancer, you should check it out, right? FP8 |
|--|--------------------------------------------------------------------------------------------------------------|

Confidential

Table 4. Illustrative quotations from data generated by CTA interviews with family physicians related to the use of pathways

| Subthemes                                                           | Quotations                                                                                                                                                                                                                                                                                                                                                                                                                                                                                                                                                                                                                                                                                                                                                                                                                                                                                                                                                                                                                                                                                                                                                                                                                                                                                                                                  |
|---------------------------------------------------------------------|---------------------------------------------------------------------------------------------------------------------------------------------------------------------------------------------------------------------------------------------------------------------------------------------------------------------------------------------------------------------------------------------------------------------------------------------------------------------------------------------------------------------------------------------------------------------------------------------------------------------------------------------------------------------------------------------------------------------------------------------------------------------------------------------------------------------------------------------------------------------------------------------------------------------------------------------------------------------------------------------------------------------------------------------------------------------------------------------------------------------------------------------------------------------------------------------------------------------------------------------------------------------------------------------------------------------------------------------|
| <p>1. Limited use in diagnosis decisions (common health issues)</p> | <p>A lot of it is stuff you just intrinsically think about. ... when you are doing your history and physical for the patient, you will always ask, if someone is coming in with anemia... "Any major sources of bleeding? How are your bowel habits? What do they look like? How many times a day do you go? How is your appetite? How is the shape of your stool?" There is just a fire of questions that you ask that I guess is intrinsic. FP7</p> <p>Like I said before, rectal bleeding is a very common patient complaint. ... I don't think it [Pathway] would have informed my practice... This is what we would be doing. What we think are red flags concerning colorectal cancer. This kind of stuff, to be honest, most GPs should know it and have it in the back of mind or the back of their hand. FP5</p> <p>For the rectal bleeding, one of my main go-tos is going to be UpToDate. The resource there. That is still the one I would refer to, but I guess from provincial guidelines, I still find that for this particular, these types of cases, it is still the TOP Guidelines. ...I think this Pathway is pretty closely aligned with the current one from TOP Guidelines. I don't think having this one in particular would necessarily change a lot of what would have been done for this patient already. FP6</p> |



|                                                  |                                                                                                                                                                                                                                                                                                                                                                                                                                                                                                                                                                                                                                                                                                                                                                                                                                                                                                                                                                                                                                                                                                                                                                                |
|--------------------------------------------------|--------------------------------------------------------------------------------------------------------------------------------------------------------------------------------------------------------------------------------------------------------------------------------------------------------------------------------------------------------------------------------------------------------------------------------------------------------------------------------------------------------------------------------------------------------------------------------------------------------------------------------------------------------------------------------------------------------------------------------------------------------------------------------------------------------------------------------------------------------------------------------------------------------------------------------------------------------------------------------------------------------------------------------------------------------------------------------------------------------------------------------------------------------------------------------|
|                                                  | <p>I was just going to say it is really good that you have the Specialist Link number there. I usually have it on a sticky on my monitor and sometimes it falls off, so this is really good. FP4</p>                                                                                                                                                                                                                                                                                                                                                                                                                                                                                                                                                                                                                                                                                                                                                                                                                                                                                                                                                                           |
| <p>2. Use in guiding and supporting referral</p> | <p>... referring to a GI [gastrointestinal] specialist, well, it's complicated. If you kind of put it that if some of these investigations come back a certain way, if CBC [complete blood count] is up, or if this is down or the other one is up, refer to GI. If this is up and this is down, if not refer to Hematology.</p> <p>And different tests you could do and add in there. FP4</p> <p>I think it is really helpful just to have these community specific pathways. Especially for people who practice in multiple communities. For people who are new to a certain community if they moved here and just don't know where to refer. ... If you refer to the wrong people, they tend to reject it. That can cause delays in diagnosis. I think that community specific piece is really what I'm really looking for within these Pathways. FP5</p> <p>They [surgeons/specialists] are not easily approachable people. ... I find that I am always in an awkward position. I am the low man on the pole.... Surgeons don't want to talk to me. I don't want to waste the radiologist's time. And I also don't want to send the patient down the wrong path... FP2</p> |

1  
2  
3  
4  
5  
6  
7  
8  
9  
10  
11  
12  
13  
14  
15  
16  
17  
18  
19  
20  
21  
22  
23  
24  
25  
26  
27  
28  
29  
30  
31  
32  
33  
34  
35  
36  
37  
38  
39  
40  
41  
42  
43  
44  
45  
46  
47  
48  
49  
50  
51  
52  
53  
54  
55  
56  
57  
58  
59  
60

|                                                      |                                                                                                                                                                                                                                                                                                                                                                                                                                                                                                                                                                                                                                                                                                                                         |
|------------------------------------------------------|-----------------------------------------------------------------------------------------------------------------------------------------------------------------------------------------------------------------------------------------------------------------------------------------------------------------------------------------------------------------------------------------------------------------------------------------------------------------------------------------------------------------------------------------------------------------------------------------------------------------------------------------------------------------------------------------------------------------------------------------|
|                                                      | <p>I think the Pathway would be good ... just having it take one extra step... where you check off you meet this, this, and this criteria and just sending that sheet off. And referral done. FP3</p> <p>I think there is not a lot of standardization in terms of in general what happens with referrals. Some specialists send the thing back to us and say, "You contact the patient and tell them about the appointment". Another one will say, "We will take care of it." I think most of the time patients have no idea when to expect a call or what to do if they haven't heard or how long to wait. It would be nice if everyone was standardized. But instructions on a paper would be great.FP6</p>                          |
| <p>3. Just relevant, easy-to-process information</p> | <p>This [pathway] is nine pages long. You don't want that when you are trying to quickly access something to jog your memory or trying to determine if someone is high risk or low risk for an investigation. FP7</p> <p>Yes, what I am looking for. I say I am a family doctor and I work from 'rules of thumbs' and I have two, so I don't want a long list of 20 thumbs. I want two thumbs. What do I look for and if this happens, send them to emerg. FP2</p> <p>We just really don't have the time, so making it super simple and easy to follow would be really, really helpful. One page. High level information of what is going to change outcomes and what is going to help outcomes and help people be seen sooner. FP4</p> |

## 3. Easily accessible

I want it all in one spot. ... it has to be just sort of in one sport and we know where to look for it. FP1

I think if they are easy to access that people would use them. If you have to search within a website too far, if it gets too cumbersome to get to, then people will give up because they will forget to bookmark it or how to get there. FP8

I would want them all together. I think it would be easy enough if it was just set up as a book mark or something that opened in easy access. ... I'm going to say I still probably prefer something within my EMR that would allow me to - Just because sometimes navigating away, ... it is not very quick. Often, I end up reverting to my phone to show patients things on the internet, because it is so much quicker than trying to do it on my computer. So, having it, again, just being able to access it and at least click a link through my EMR would probably be quicker than me trying to open everything else up. FP3

1  
2  
3 Appendix 1. Interview guide  
4  
5  
6

7 **Pathway selection**  
8

9  
10 Show/ask the participant to look at the three diagnostic pathways.  
11

- 12 - If interview is by phone, CTA Coordinator will have emailed these to the participant prior to  
13 interview so that they can review during the interview  
14
- 15 - If interview is conducted by Zoom, the interviewer can share their screen to have the participant  
16 view the pathways  
17  
18  
19

20  
21 Ask the participant to choose a pathway and recent patient that best relate in terms of symptoms or  
22 cancer diagnosis.  
23  
24  
25  
26  
27

28 **Grounding**  
29

30 How many patients do you currently have with a cancer diagnosis?  
31

32 Thinking of a patient you saw recently (chosen from step 1), tell us about the care you provided for that  
33 patient.  
34  
35  
36  
37  
38

39 *Probes:*  
40

41 What are some things you accessed to know what care to provide for this patient?  
42

43 What did you use? What did you like about it? What did not work well?  
44

45 Who on your team was involved in this patient's care?  
46

47 Were there specialists involved in this patient's care?  
48

49 How did you give and receive information with them?  
50

51 How did you know what your role is? Theirs?  
52

53 What would help clarify roles and processes in this patient's care?  
54  
55  
56  
57  
58  
59  
60

1  
2  
3  
4  
5 **Mental Simulation**  
6

7 Now I would like you to focus on the pathway you chose. Thinking of this same patient, I would like you  
8 to consider the following:  
9

10  
11  
12  
13  
14 *Counterfactual 1:*  
15

16 Had this pathway been available to you for this patient, would it have informed your approach, and if so  
17 how?  
18

19 Would it have changed anything in your approach? (If yes, what specifically?)  
20

21 How would have you used it? (E.g., with the patient? When? Which elements of it or all?)  
22

23 Who else might have been involved? How would have you interacted with them?  
24

25 What is useful about using a pathway such as this?  
26

27 What about this pathway is off the mark?  
28

29 What would you add or change?  
30

31 Would this pathway enhance your experience of providing care? What about your patient's experience?  
32  
33  
34  
35  
36  
37  
38

39 *Counterfactual 2:*  
40

41 Where would you want to find or access this pathway?  
42

43 How would you see this integrating into your work?  
44

45 When thinking about this pathway, and others that are or might become available (e.g. lung cancer,  
46 breast cancer, prostate cancer), how would you want to access these pathway?  
47

48 Would you want them bundled together or kept separate?  
49

50 If kept separate, would there be any exceptions? (I.e., would certain pathway be grouped together but  
51 others not?)  
52  
53  
54  
55  
56  
57  
58  
59  
60

1  
2  
3 If bundled, which would you bundle together?  
4

5 Other ideas?  
6  
7  
8  
9

10 The pathway we have provided as examples are for high-risk presentations, situations likely to be  
11 diagnosed as cancer. Where do you think resources for lower risk presentations fit?  
12  
13

14 Where and how would you want to access resources for low risk presentations?  
15

16 Would you want them bundled with pathway for high-risk presentations? (E.g., three we have shown,  
17 also developing ones for head and neck cancer, sarcoma)  
18  
19

20 How would you integrate these into your work?  
21  
22

23 Do you have anything further to add about the use of clinical cancer pathway (specifically examples  
24 shown or in general)?  
25  
26  
27  
28  
29

30 **Closing**  
31

32 Do you have any questions for us, or any further comments?  
33  
34  
35  
36  
37  
38  
39  
40  
41  
42  
43  
44  
45  
46  
47  
48  
49  
50  
51  
52  
53  
54  
55  
56  
57  
58  
59  
60
